# Supplementary material for: Understanding Local Reactions Induced by Bothrops jararaca Venom: The Role of Inflammatory Mediators in Leukocyte–Endothelium Interactions
Source: MDPI journal article supplement (doi:10.3390/biomedicines12040734), 2024-03-26
Supplement: s1 [file s1]

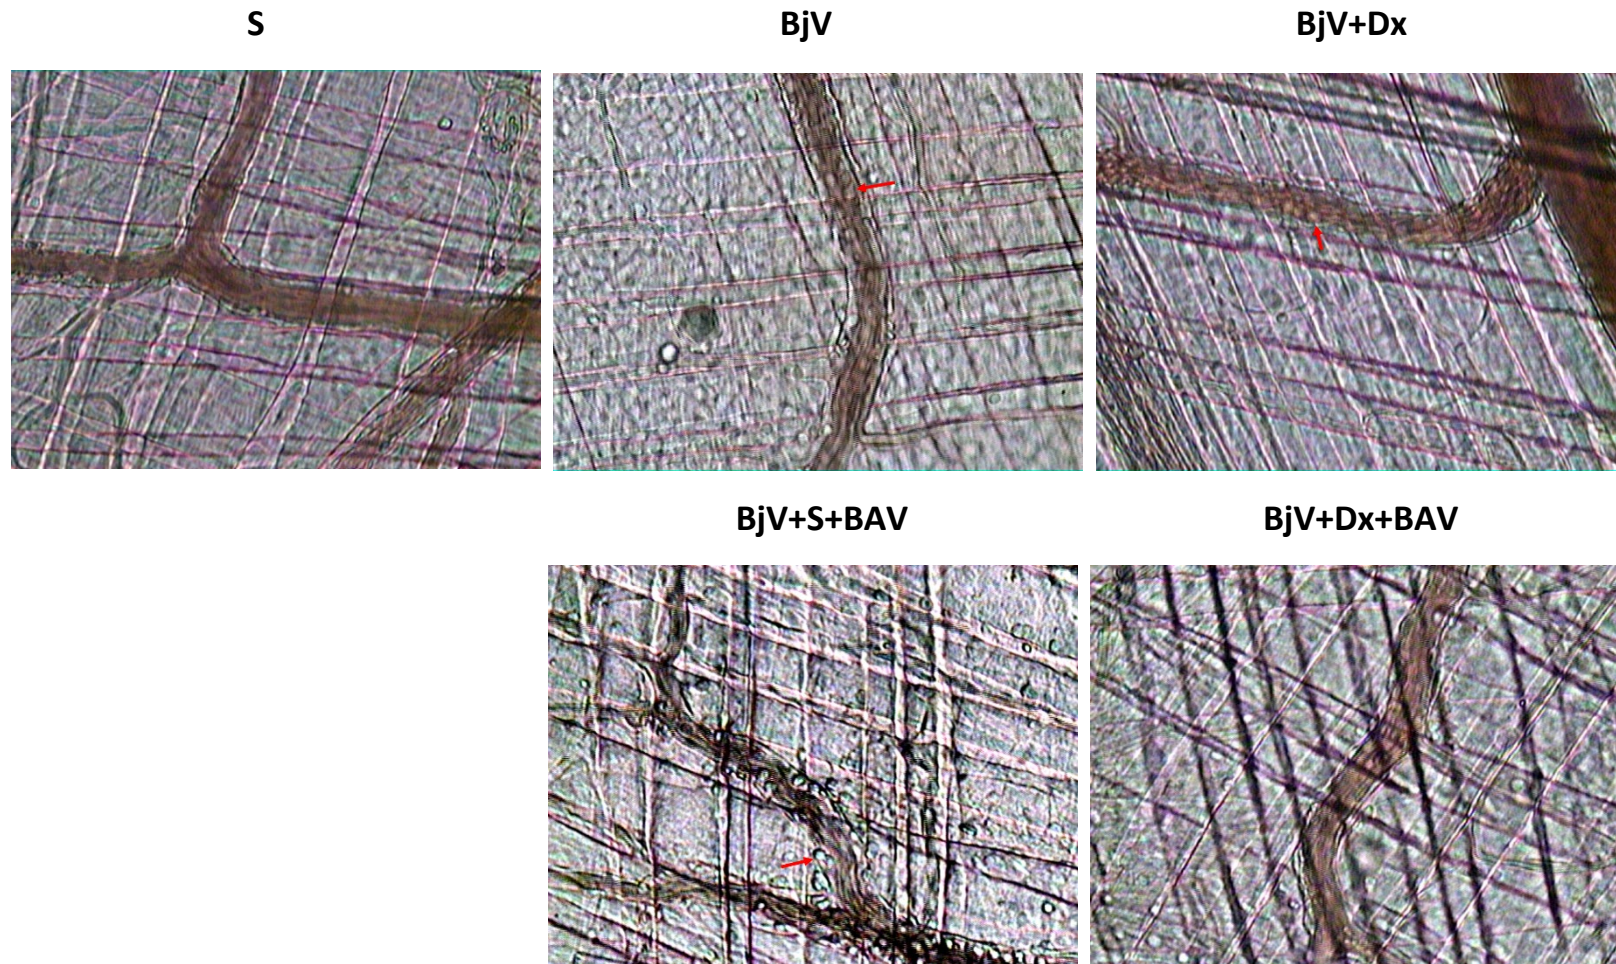

**Supplementary Figure S1.** The panel shows representative photomicrographs of the data of adhered cells of the Figure 4A. Images were obtained in a microscope, Axioplan II, Carl Zeiss, Germany, equipped with Achroplan objectives with 10.0 longitudinal distance, 0.25 numeric aperture, and 1.60 optovar. Red arrows indicate adhered leukocytes.



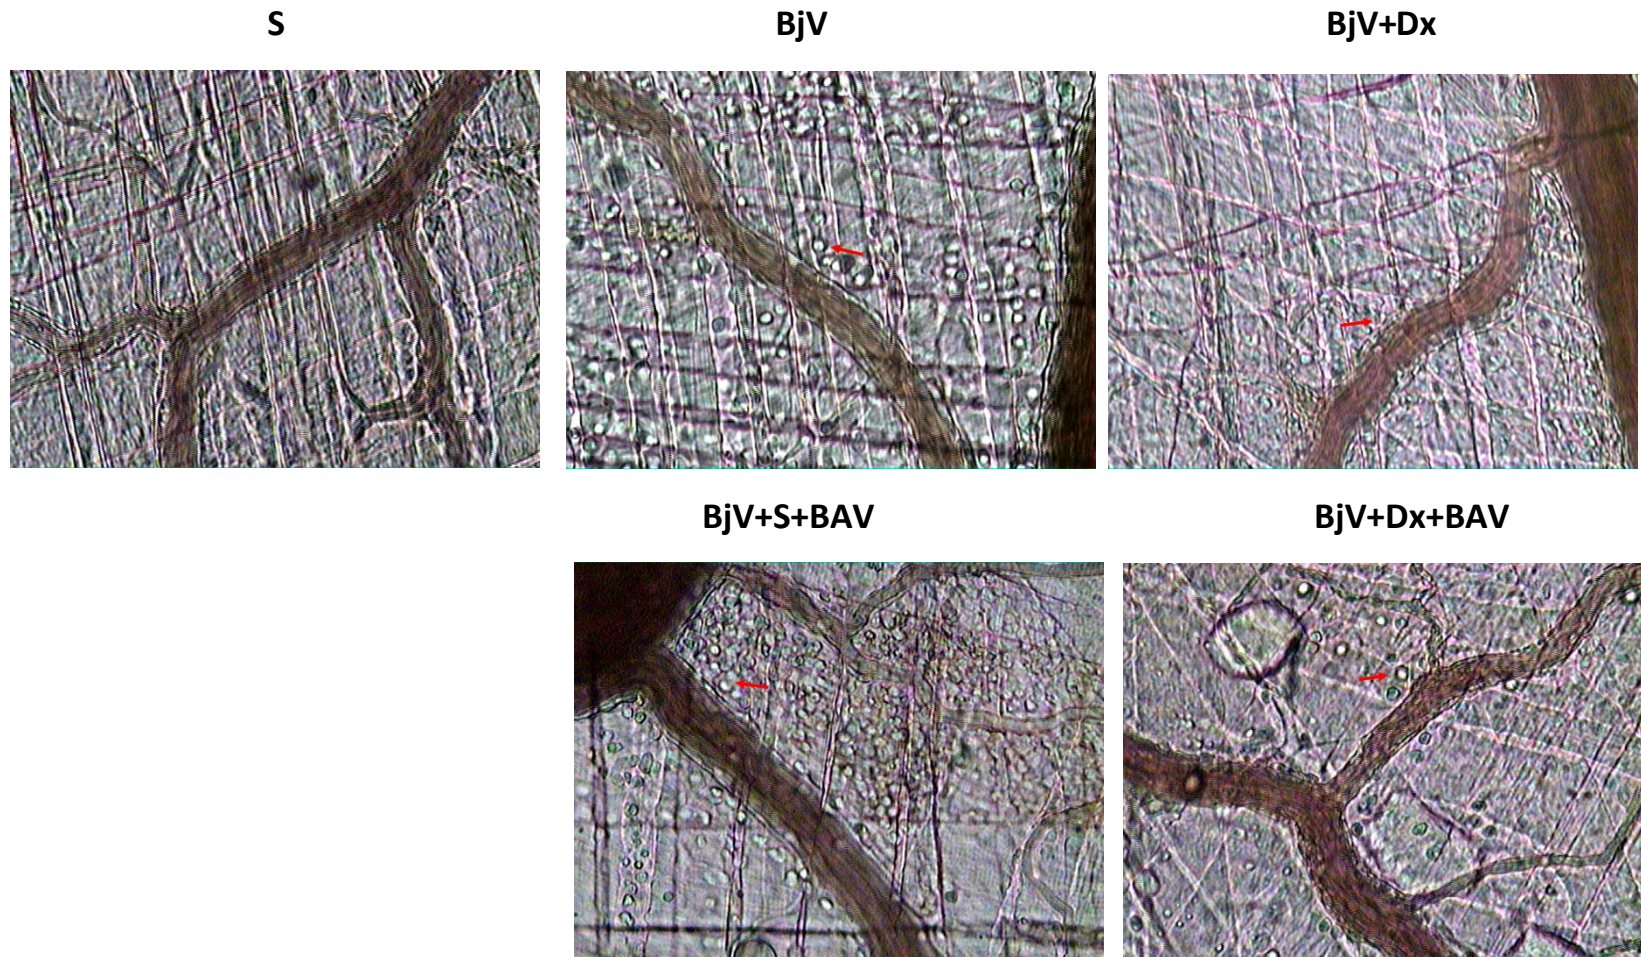

**Supplementary Figure S2.** The panel shows representative photomicrographs of the data of migrated cells of the Figure 4B. Images were obtained in a microscope, Axioplan II, Carl Zeiss, Germany, equipped with Achroplan objectives with 10.0 longitudinal distance, 0.25 numeric aperture, and 1.60 optovar. Red arrows indicate migrated leukocytes.
